# Supplementary material
Source: PubMed Central journal article supplement (PMC4794657)
Supplement: JVI.02360-15_zjv999091496so1.pdf [file JVI.02360-15_zjv999091496so1.pdf]

1 **Supplemental Material**

2

3 **The P1N-PISPO Trans-frame Gene of Sweet Potato Feathery Mottle Potyvirus is Produced During Virus Infection and Functions**

4 **as RNA Silencing Suppressor**

5 Ares Mingot, Adrián Valli, Bernardo Rodamilans, David San León, David C. Baulcombe, Juan Antonio García and Juan José López-Moya

6

7

8

9

10 List of contents:

11 **Table S1. Primers used in this study**

12 **Table S2. Expected gene products deriving from SPFMV isolate AM-MB2**

13 **Table S3. Expected gene products deriving from SPV2 isolate AM-MB2**

14 **Table S4. Expected gene products deriving from SPVC isolate AM-MB2**

15 **Table S5. Expected gene products deriving from unknown Sweet potato begomovirus isolate AM-MB2**

16 **Table S6. Expected gene products deriving from unknown Sweet potato badnavirus isolate AM-MB2**

17 **Table S7. Detailed indel data of the sequence of Sweet potato potyviruses found in the AM-MB2 sample**

19 **Table S1. Primers used in this study**

| Primer      | Sequence (5'-3')                      | Application                                                                                                               |
|-------------|---------------------------------------|---------------------------------------------------------------------------------------------------------------------------|
| FMCpFdeg    | GCATCATCAAAGGGTGYGAG                  | Detection of an SPFMV CP amplicon (389bp) with a degeneration (Y=C or T) in order to amplify most SPFMV strains/isolates. |
| MFRdeg      | ACTGCATGRTCCAACAATGG                  | Detection of an SPFMV CP amplicon (389bp) with a degeneration (R=G or A) in order to amplify most SPFMV strains/isolates. |
| CSCPF       | cctctagaATGGCTGATAGCACTAAAG           | Detection of an SPCSV CP amplicon (790bp).                                                                                |
| PCSCR       | ccctcgagTCAACAGTGAAGACCTGTTC          | Detection of an SPCSV CP amplicon (790bp).                                                                                |
| FMP1seqF    | GAATGCGTACCTTAGTGATG                  | Sequencing of the different transframed P1 versions.                                                                      |
| FMP1F       | <u>ccac</u> ATGGCAACTGTAATGGC         | Directional cloning of P1wt in pENTRY-D-TOPO.                                                                             |
| 1PMFR       | <u>CTAATACTGGATGATGTATGGTAG</u>       | Cloning of SPFMV P1wt in pENTRY-D-TOPO.                                                                                   |
| FMHCF       | <u>cacc</u> ATGAGCTCTACTATGGAAAG      | Directional cloning of SPFMV HcPro in pENTRY-D-TOPO.                                                                      |
| CHMFR       | <u>CTAGCCTACTATGTAGTGTTCAT</u>        | Cloning of SPFMV HcPro in pENTRY-D-TOPO.                                                                                  |
| FMPISPOF    | <u>cacc</u> ATGGAAAAAACTGGACGAACAATAG | Directional cloning of SPFMV PISPO in pENTRY-D-TOPO with stop in P1 frame.                                                |
| OPSIPMFR    | <u>CTACCAAGTTTCATTCGTGCG</u>          | Cloning of SPFMV PISPO in pENTRY-D-TOPO.                                                                                  |
| FMP1onF     | GGAAAAAACTTGACGAACAATTGG              | Site-directed mutagenesis of SPFMV P1 in order to stop the PISPO frame.                                                   |
| no1PMFR     | CCAATTGTTTCGTCAAGTTTTTTCC             | Site-directed mutagenesis of SPFMV P1 in order to stop the PISPO frame.                                                   |
| FMP1NPISPOF | GG( <b>+G</b> )AAAAAACTGGACGAACAATAG  | Site-directed mutagenesis of SPFMV P1 in order to force the PISPO frame and to stop the P1 frame.                         |
| OPSIPN1PMFR | CTATTGTTTCGTCCAGTTTTTT( <b>+C</b> )CC | Site-directed mutagenesis of SPFMV P1 in order to force the PISPO frame and to stop the P1 frame.                         |
| FMP1ΔF      | CAATAGGCCACAAGGAAC                    | Site-directed mutagenesis of SPFMV P1 in order to generate a truncated P1.                                                |
| Δ1PMFR      | GTTCCCTGTGGCCTATTG                    | Site-directed mutagenesis of SPFMV P1 in order to generate a truncated P1.                                                |
| FMPISPOΔF   | GGGGTCC <b>TAGCGG</b> GAGTC           | Site-directed mutagenesis of SPFMV P1 in order to generate a truncated P1N-PISPO.                                         |
| ΔOPSIPMFR   | GACTCG <b>CGCTAGG</b> ACCCCC          | Site-directed mutagenesis of SPFMV P1 in order to generate a truncated P1N-PISPO.                                         |
| GFP1F       | CAACTTCAAGACCCGCCACA                  | qRT-PCR for GFP.                                                                                                          |
| 1PFGR       | TCTGGTAAAAGGACAGGGCCA                 | qRT-PCR for GFP.                                                                                                          |
| UBIF        | TCCAGGACAAGGAGGGTATCC                 | qRT-PCR for Ubiquitin.                                                                                                    |
| IBUR        | TAGTCAGCCAAGGTCCTTCCAT                | qRT-PCR for Ubiquitin                                                                                                     |

20  
21

<sup>1</sup>Lowercase indicates the restriction sites used for cloning or the motive required for directional cloning in pENTRY-D-TOPO (underlined). Introduction of start/stop codons are denoted with underlined capital letters. Bold letters indicate nucleotide replacement/insertions used for mutagenesis.

22 **Table S2. Expected gene products deriving from SPFMV isolate AM-MB2<sup>1</sup>**

| Predicted Gene Product | Genome position (first) | Genome position (last) | Size (aas) | MW (Da)  | pI (calc.) | Sequence                                                                                                                                                                                                                                                                                                                                                                                                                                                                                                                                                                                                                                                                                 |
|------------------------|-------------------------|------------------------|------------|----------|------------|------------------------------------------------------------------------------------------------------------------------------------------------------------------------------------------------------------------------------------------------------------------------------------------------------------------------------------------------------------------------------------------------------------------------------------------------------------------------------------------------------------------------------------------------------------------------------------------------------------------------------------------------------------------------------------------|
| <b>P1</b>              | 118                     | 2103                   | 664        | 74107,71 | 9,24       | MATVMASAKPAGKRKLTWKECCNKWGRAAMEQQQQQQSKT VH LGRDHLAAYLLAFVPETEWHKYYYGSRGGPSPALLILKGAIEHGEVYKWESELTFCACED DVL DGHNCDCSGHRHIKRDDNIADNMNAIARALGGYDAYYASNWAVYETAKYELDQVAPTAGMLYKQAKEAEKLLGKRPTTRREIQEVEDLWAEYEEAAAREAVEA SEASNGHATSEVANKNAYLSDDEEDDEFPPLVVTVKEVVPVTTTIIESTPEVKGKTEVQTPLEPVEVLAATTFVEATIEGKDAPTGSIQFGTIVCALEPIKASEAGIVKEP TTGFFFGTIPAIPLPTIPLKLEPTIVEPIATPVVEVTSSEIVKVIATPTEVEKASKAPLPHLYPWWTAKTQTPGEVHHKMVRKWVQKTTQAAAAEKEKLVWKKLDEQL ATRNEIRKGLKVKVWRWGLYRLVKKTRKDNQRQRQRMEKEQQLLAMPQPVLVTSIGIAGGSPASLEMTPTPNKGFICTPSMKKKKTLKSPKLTQEKIHELTAVAL KIACRKRMSIELVGGKSTKQYRKFQGANLFLHLKHMEGLRESVDLRIHTTTQNLVLAQAAVGAWKRPVKTMLSKGSSGMVLPDCKLGRPHAPHGLVVRG ALRGVLYDARMKLGSRVLPYIIQY |
| <b>P1N-PISPO</b>       | 118                     | 2072 (+1)              | 654        | 72726,52 | 6,17       | MATVMASAKPAGKRKLTWKECCNKWGRAAMEQQQQQQSKT VH LGRDHLAAYLLAFVPETEWHKYYYGSRGGPSPALLILKGAIEHGEVYKWESELTFCACED DVL DGHNCDCSGHRHIKRDDNIADNMNAIARALGGYDAYYASNWAVYETAKYELDQVAPTAGMLYKQAKEAEKLLGKRPTTRREIQEVEDLWAEYEEAAAREAVEA SEASNGHATSEVANKNAYLSDDEEDDEFPPLVVTVKEVVPVTTTIIESTPEVKGKTEVQTPLEPVEVLAATTFVEATIEGKDAPTGSIQFGTIVCALEPIKASEAGIVKEP TTGFFFGTIPAIPLPTIPLKLEPTIVEPIATPVVEVTSSEIVKVIATPTEVEKASKAPLPHLYPWWTAKTQTPGEVHHKMVRKWVQKTTQAAAAEKEKLVWKKLDEQL <b>GHKERDQKRSQSKMEVGLTQTSQEDQEGQPKTAPTEAHGEGTAIDGYATSSSDGHLHCWGSIGESGNDSEWEDFLHAFHEEENFKISQINTRENSRAHA GSENCVQEKDEHRIGGQEVHKRAVQESRSLFVPSFKTYGRLKRVSGFKNSHNSKPRPTSSCQGWSMEKTCCKDNVVRQRFKWHGAESRQTVGPKRSCTTR NARGAWGFRSAIRRTNETW</b>    |
| <b>HCPro</b>           | 2020                    | 3477                   | 488        | 52149,48 | 7,86       | SSTMERFLSGFDNKFQMRQTDLNHVCESSYDAEQAGSVAISHHMLYPMGRITCKFCINNVEDMSRDEWCEYVRSFISRNKILCQSEYKNFVHLPQIMDFLSDSL VNTNKNLKAFFNEIQNLIGDRDAPFTSVCEVNVKLVKGGRAKSDDELKASENLEAVARYLKNRTEINIKKGLSQSFRNKISQKSSVNLALMCDNQLDKNGNLWGERGY HSKRFFANFYFDVIDPSQGYEKYVIRENPNNGSRKLAIGKLVSTNFSVFRQMKGEPIQKQKLDNHCSTLRDGNFYVPCCVTLDDGQPLESEFKLPTKNHLVIGNSG DPKYVDMPEISKNMVIAKDGICYVNFAMLVNVAEAEAKDFTKQVRDVLMEKLGKWPMTFVATACAFMSVFPETRNAELPRILVDHSTKTMHVVDVSGFLST GYHVLKANTVSQLIQFSSSLESEMKEYVYG                                                                                                                                                                                                                    |
| <b>P3</b>              | 3484                    | 4533                   | 352        | 39639,25 | 8,52       | GVTALPDVQERCIRTIKGVYKPDVMYITILSEDPYALLSVMSPRILLALLNSGSLDRSMEAWITEDQEVAVIIGTLQELAKKVVSTSRVLEKQKLVIESQAHTLLFDPAFV RSRTPSFALSQKIRGLAEGRESNRVLYEQGHSIASYAASHHELMKIEWDRLLKEEYGLPWHGKCAQIMRSSKACGLLSIPTWPKIGALSDRATDLCTLLHTKSTCHV KNTCRNGVQRIADAHKCVRTIMRSLAAIKFAIPDVLKFNMLLVINLLQIAKAVARDMSMKHRQAQIDLNAYLFDQEKIDVNNVYDAYCLKIGGEPTMDEFLGHVEYI NPTLSGTAKWLCYTADMEVKHQ                                                                                                                                                                                                                                                                                                                           |
| <b>P3N-PIPO</b>        | 3484                    | 4145 (+1)              | 223        | 25461,58 | 9,35       | GVTALPDVQERCIRTIKGVYKPDVMYITILSEDPYALLSVMSPRILLALLNSGSLDRSMEAWITEDQEVAVIIGTLQELAKKVVSTSRVLEKQKLVIESQAHTLLFDPAFV RSRTPSFALSQKIRGLAEGRESNRVLYEQGHSIASYAASHHELMKIEWDRLLKEEYGLPWHGKCAQIMRSSKACGLLSIPTWPKIGALSDRATDLCTLLHTKSTCHV <b>CHIQEYL</b>                                                                                                                                                                                                                                                                                                                                                                                                                                               |
| <b>6K1</b>             | 4540                    | 4689                   | 52         | 6048,15  | 8,87       | GKSRKEMQYERIIAFVLLMIVDSEKSDCVYIKQLKGLMGTINNDVYHQ                                                                                                                                                                                                                                                                                                                                                                                                                                                                                                                                                                                                                                         |
| <b>CI</b>              | 4696                    | 6618                   | 643        | 72047,24 | 6,62       | SLDDITNVLEEKNLTVDFELQSGEHPNTDSTDFDEWRRRIETNNTITHYRTEGVIIEFTRSNVSVNNIATIDAKDILIRGAVGSGKSTGLPFYLSRKGVRLLLEP TRPLAENVHRQLGGEPFMVQATLRMRGLTVFGSHPINIMTGFAGHYANNPEQIGEYDFIMFDECHVHDAQAMAFRCLLKEHEFKGKILKTSATPPGREVEFTTQY PVQIKVEERLSFKAFVEAQTGNSADVVTIADNLYVYASNEVDEL SRMLVEANYKVTKVDGRTMKVGNVEIQTCGSPQKXHFIVATNIIENGVDLIDIEAVDFGTKV TAYLDVDLRALHMSKGPISYGERIQLRGRVGRNKAGVALRIGFTEKGLTEIQPTTAEAAFLCFAYGLPVMTPNVSTLSLSTCTVKQARTMLQFELTPFYVMVMVRY DGSMPHAIHSILKYYKLRDAETDLNKAIPNRGVTGWLSVGEYAKSGKRMIDDSVRIFLNPSPERLHVDIWDAITKYKHEAGFGRISINSCKVAYTLQTDLYAIP RTIKIADIALIADEMRKEHYKTIIGRTVSSSFTLNSIATLWRNRYAQDYTSENIAVLSSVRSQLEFENLSDSSFNMSGEEAALRAYVREITGATSCVLHQ                                 |
| <b>6K2</b>             | 6625                    | 6777                   | 53         | 5929,98  | 9,4        | TKDSLKHRLKGVWVNSVITQDLFILAGVFAAGLWMIMAGLKESEFDQTVLHQ                                                                                                                                                                                                                                                                                                                                                                                                                                                                                                                                                                                                                                     |
| <b>Nla</b>             | 6784                    | 8082                   | 435        | 48985,93 | 8,29       | GKEKRMQKLFKFKARDNKLGEVHADDGTIEHFFGSAYTKKGKQKGVKVTGMGSKNRKFINMYGDFPTEYSFVRFVDPDTGAVMDDSPYTDILLVQEKIGEARLNA IKEDELSREKVAQNPQIHAYYINEITNAALKVDLTPHNPLLACERHSTIAGHPEYEGVLRQTGPPKMTLNDVPVNPPEEASLVGHEKSLFRGLRDYNPASVICHLMN EADGRTSDCFGIYGGIITNRHLFKRNNGLTIKSRHGEFVIKNTTQLGMPKACADRDLIIRMPKDIPPPQRIKFRVPKENERICLVGNSFDQKSTISSETSCHV PNSHFVKHWIDTKDGHGCLPLVSTTDGALLGVHLSNLNTNQNFASFPEFVYDKTPEAMDWIKKWSYNPDEICWGTLELKTGGPVAPFKVSKLITLDEGIQYV AQ                                                                                                                                                                                                                                                  |
| <b>VPg</b>             | 6784                    | 7353                   | 192        | 21543,47 | 7,23       | GKEKRMQKLFKFKARDNKLGEVHADDGTIEHFFGSAYTKKGKQKGVKVTGMGSKNRKFINMYGDFPTEYSFVRFVDPDTGAVMDDSPYTDILLVQEKIGEARLNA IKEDELSREKVAQNPQIHAYYINEITNAALKVDLTPHNPLLACERHSTIAGHPEYEGVLRQTGPPKMTLNDVPVNPPEEASLVGHE                                                                                                                                                                                                                                                                                                                                                                                                                                                                                         |
| <b>Nlb</b>             | 8089                    | 9645                   | 521        | 59773,15 | 5,59       | TRSDRWVQDRLYGNLKAQGCPAQLVTKHVVKGKCMFLFDLYLQDDQSEREYFKPLMGAYGKSRLNKEAYNKDLFKYATIQAGDQVQDVFELAEERSVVSMLTSK GFEKCNITDPEEILRALNMKAAYGAMYSGKKKDYFEGMSDHDVEDHLFHSCKRFLMGHKLWNGSLKAEALRPMKVELNKRTRTFTAAPLDTLLGGKVCVDDFNN MFYNNHLLKCPWTVGITKQYQWDRLLTSLPEGWVYCDADGSDSLSPLVNSLVNIRREFMEDWDVGDQMLRNLYTEIVYTPITPDGTIVKFKGNNSGQPSV VVDNTLMVAVHYTLKLGIESEFDKCCVFFANGDILLAMRPDTHALLDEFGGCFSELGLNYDFSSRTNKKEDLWFMSCGVKRDGIFPKLEPERIVSILEWDR SHEPIHRLAICAAVMSWGYDELLHHRKCYAWLQDAPYNELARNGKAPYIETALKALTYGQVFNASELSAYTRVLMKEMDSDVLENDLEVYHQ                                                                                                                                                                |
| <b>CP</b>              | 9652                    | 10590                  | 315        | 35146,61 | 6,66       | SSESTEFKNAGADPPAPKPKNIPTTITETDPEDPKQAALKAARAKQVAPVIESYGRDTSKERESVIGASSKGVKLDVNVGTVFTVPRVKNANAKKRQPMVN GRAINFQHLSTYEPEQFEVANRSTQEQFQAWYEGVKGDYGVDDTGMGILLNGLMWVCIENGTSPNIGVWTTMMDGDEQVYPIKPLLDHAPVPTFRQIMTHFSD VAEAYIEMRNRKAYMPRYGLQRNLDMSLARYAFDFYELHSTTPARAKEAHLQMKAAALKANARRLFGLDGNVSTQEEDTERHTTDDVTRNIHLLGMRGVQ                                                                                                                                                                                                                                                                                                                                                                       |

23 <sup>1</sup> Prediction of the SPFMV protein products based on the preliminary nucleotide annotated sequence deposited in GeneBank (Accession Number KU511268).

24 **Table S3. Expected gene products deriving from SPV2 isolate AM-MB2<sup>1</sup>**

| Predicted Gene Product | Genome position (first) | Genome position (last) | Size (aas) | MW (Da)  | pI (calc.) | Sequence                                                                                                                                                                                                                                                                                                                                                                                                                                                                                                                                                                                                                                                               |
|------------------------|-------------------------|------------------------|------------|----------|------------|------------------------------------------------------------------------------------------------------------------------------------------------------------------------------------------------------------------------------------------------------------------------------------------------------------------------------------------------------------------------------------------------------------------------------------------------------------------------------------------------------------------------------------------------------------------------------------------------------------------------------------------------------------------------|
| P1                     | 118                     | 1971                   | 618        | 70385,46 | 9,33       | MACVTNGTAFARKKKMTWKECCNKWGRAAMEQQQGGKSAYTTEVSRDQLAANIFAFIPTTEWHSYYVARVGLSANALKYAIISFGEKEYEHGANFNRCPECDCAI<br>DEHYCDECEIRFKKADDNIKNMNGTAKALGGWDNYYAATWKQFEAAKYDMEQIAPTAGMLERRAKEAEKLLGKKAKKHEIAEVQQLWEEFEAAKELEAEETFFFE<br>HEASLSSIEPTTYEEAFPLKVTSDVSTNTSQASGVVEDNLGFFFGFGEIPAKIALPTIPILEILPAAPILNNGELNDITEVKQPEVIDEVCVTTQPKETDIIQSGLKKYELV<br>NGKFQKVKLTKTLYPWGDRKTPGKTQHAMVTKWVRKMSSEADKEEKIWSAWEHTKKQLEKRLDLKVKWRYGMFRLAKTRKDNQRQLKQRAMLEQKLL<br>EMMPQQVSTISIGGLAPSHMEEATQKSGMIFCTPSMKKRKLFKPLVSNGLNDLNTQAVLKIACKKEMNVFVIGKRVIKGDYTRKENVRHLRLQLKHKMKGLRHSID<br>LRIPSDLQALIVKAAHVAWKKIYNTQNVVKGMSGFVLPQRLQGGTGHAPQGFVVRGAFKGVLYDARMKIGRSILPYMEQF                      |
| P1N-PISPO              | 118                     | 1919 (+1)              | 601        | 68297,56 | 6,61       | MACVTNGTAFARKKKMTWKECCNKWGRAAMEQQQGGKSAYTTEVSRDQLAANIFAFIPTTEWHSYYVARVGLSANALKYAIISFGEKEYEHGANFNRCPECDCAI<br>DEHYCDECEIRFKKADDNIKNMNGTAKALGGWDNYYAATWKQFEAAKYDMEQIAPTAGMLERRAKEAEKLLGKKAKKHEIAEVQQLWEEFEAAKELEAEETFFFE<br>HEASLSSIEPTTYEEAFPLKVTSDVSTNTSQASGVVEDNLGFFFGFGEIPAKIALPTIPILEILPAAPILNNGELNDITEVKQPEVIDEVCVTTQPKETDIIQSGLKKYELV<br>NGKFQKVKLTKTLYPWGDRKTPGKTQHAMVTKWVRKMSSEADKEEKIWSAWEHTKKQLEKRLDLKVKWRYGMFRLAKTRKDNQRQLKQRAMLEQKLL<br>EMMPQQVSTISIGGLAPSHMEEATQKSGMIFCTPSMKKRKLFKPLVSNGLNDLNTQAVLKIACKKEMNVFVIGKRVIKGDYTRKENVRHLRLQLKHKMKGLRHSID<br>LRIPSDLQALIVKAAHVAWKKIYNTQNVVKGMSGFVLPQRLQGGTGHAPQGFVVRGAFKGVLYDARMKIGRSILPYMEQF                      |
| HCPPro                 | 1972                    | 3375                   | 458        | 52595,4  | 7,9        | SQTGDRFWNGYDQMYRDLRNEQDHIKSDLDVSEAGKLAAMVQHLCLPMMNRITCLTCKANKILEMSSSEWVEHIRMVFNKLEFIRKECPNYKHVHMVMIETMTKN<br>LVHENKLNKAFNEIQQLIGDRTPAFSTVNEINKILVKGKIKAEFFLQAEHLLLEAVRYLKNRTEENIKKGLSVFRNKISQKQAHNLSLMCDNLQDKNGNLIWGDGRY<br>HSKRFLSNYFEVVDPEQGYEKHIIQRPNPARGKLAIGKLVSTNFSVFRQEMKGEPIPKLLDNHCTSLREGNFVYPCCVTMDGDTPIESEFLPTKNHLVIGNSGD<br>PKYVDMPEVDKMYIAKEGYCYVNIFLAMLVNIENSDAKDFTKQVRDILMEKLGKWPMSYDVATACAWISIFYPETRNAELPRILVDHNTKTMHVIVDSFGLTGTGYH<br>VLKANTVSQLIQFSSNSLDSEMKHYLVG                                                                                                                                                                                    |
| P3                     | 3346                    | 4401                   | 352        | 40115,96 | 8,42       | GIVGVSDEERCLRSIIKSVFKPELMHQILEEDPYVLLLSILSPRVLLALFNSGSLDRSLEKWLTKDQEVSTILGILIELSRKVTARTLDEQLNVIEGHASYLIDNLWIEG<br>RKTVAHALSYKIARGLSEKREANKVLYEQGHRITAFISSHEMMEKIWDQLLEAWNELSWQEKCCSMRSLKYAKPLQGGFPQVNIQGLKDKVGESELTTLHTKSAVI<br>GKECKKSVIDNVAASYKSMIRNTINVTLSTVRLMPDILKFNINLLVINLLQIAKTAKSMNQKTKQMKIDLGEFMDQEIQKINVIYNSMCSKEGLPTKEEFLEKVEYELN<br>PQLLGTAKWLVYAYDSVDFHQ                                                                                                                                                                                                                                                                                                 |
| P3N-PIPO               | 3346                    | 4004(+1)               | 220        | 25320,43 | 9,43       | GIVGVSDEERCLRSIIKSVFKPELMHQILEEDPYVLLLSILSPRVLLALFNSGSLDRSLEKWLTKDQEVSTILGILIELSRKVTARTLDEQLNVIEGHASYLIDNLWIEG<br>RKTVAHALSYKIARGLSEKREANKVLYEQGHRITAFISSHEMMEKIWDQLLEAWNELSWQEKCCSMRSLKYAKPLQGGFPQVNIQGLKDKVGESELTTLHTKSAVI<br>GKECKKSVIDNVAASYKSMIRNTINVTLSTVRLMPDILKFNINLLVINLLQIAKTAKSMNQKTKQMKIDLGEFMDQEIQKINVIYNSMCSKEGLPTKEEFLEKVEYELN<br>PQLLGTAKWLVYAYDSVDFHQ                                                                                                                                                                                                                                                                                                 |
| 6K1                    | 4402                    | 4557                   | 52         | 5733,7   | 8,14       | AKSAKESYERIAFIALVLMVIDAERSDCVYKSLNKLKGLMGTIGDGVYHQ                                                                                                                                                                                                                                                                                                                                                                                                                                                                                                                                                                                                                     |
| CI                     | 4558                    | 6486                   | 643        | 72285,5  | 7,04       | SLDDISNEFEKKLIDFELQSDSHINESDSTFGDWWKQLETTNNVIPHRYTEGHFMEFTRANAVSVANTIAMSPHKDILLIRGAVGSGKSTGLPFYLSRKGRVLLV<br>EPTRPLAENVHRQLAGEPFMIQSTLRMRGLSVFSGAPISIMTSGFANFYAHNPDLREYEFVIFDECHVNDAHAMAFRCLLHEHAFNGKVLKVSATPPGREVEFST<br>QYPVKIKTEERLSFQAFVDAQGTGNSNDVISSADNIIYVASYNEVDELSKMLIDRGHKVTVDGRTMKVGNVEIITSGTNSNKKHIVATNIENGVTLDEIAVVDVFGTK<br>VTVYLDVDSRMIRPCGPIYGERIQRGRVGRNKAGIALRIGFTERGLCEIPQVATEAAFLSFAYGLPMTNNVSTLSLSTCTVQARTVLQFELTPFYTVNLVRYD<br>GSMHQAIHNLKKYKLRDSEIVLNKLAIPNRGITGWLVCYDRIQGRMDLDDSRIPFLNNAAMPVRLHQEIWDVIQKYKHEAGFGRSLCSISACKIAFTLQTDMYAIPRTI<br>KILDALIESEMRKKEHFKVTGRTTSSHFTLNSIATMWRARYAQDYTSENIAILTAASKLLEFANLSTDVSVFNEMSEMSLSSYIRDSGAVSCVQHQ |
| 6K2                    | 6487                    | 6645                   | 53         | 5889,02  | 7,92       | SAEAMAKHLKLGWICKSLMTQDILLVLAGVFIGGIWMIMQGAQDAFDETVRHQ                                                                                                                                                                                                                                                                                                                                                                                                                                                                                                                                                                                                                  |
| Nla                    | 6646                    | 7956                   | 437        | 49625,31 | 8,52       | GKDKRQRQKLFREARDKKMGFEVTDADDGTEHFFGEAYTKKGKQKGTGMGSKNRRFINMYGDFDPTYESLVRYVDPLTGKIIDDSIYTDVLLVQEQFTKARREAI<br>NDDLLSNEKVAQNPVIVAYFIKEGANAALKVDLTPHNPLKACDRINTIAGFPERESELRTGTGQPIQISKNQVPHNPETSDSSVVTHEKSLFRGLRDNYPNIAVICHV<br>NTSDGRTTDFVGLGFGGLITNRHLFKRNGGELLIKSRHGFTIKNTTQLHMMPCSERDILVIKMPKDIPFPQKLRFRVPKENERICLVGSNFQKESITSTVSETSVC<br>RVDRSHVFKHWVDTKDGHCGLPVSTTDGAILGLHSLSTMTNSQNFFAAFPESFEEDYLRSPESLEWVRKWSYNPDEVCVGSLQLQWSQPGEFPKPTKLMSDLN<br>AIPVYAQ                                                                                                                                                                                                          |
| VPg                    | 6646                    | 7227                   | 194        | 21935,72 | 8,84       | GKDKRQRQKLFREARDKKMGFEVTDADDGTEHFFGEAYTKKGKQKGTGMGSKNRRFINMYGDFDPTYESLVRYVDPLTGKIIDDSIYTDVLLVQEQFTKARREAI<br>NDDLLSNEKVAQNPVIVAYFIKEGANAALKVDLTPHNPLKACDRINTIAGFPERESELRTGTGQPIQISKNQVPHNPETSDSSVVTHEKSLFRGLRDNYPNIAVICHV<br>NTSDGRTTDFVGLGFGGLITNRHLFKRNGGELLIKSRHGFTIKNTTQLHMMPCSERDILVIKMPKDIPFPQKLRFRVPKENERICLVGSNFQKESITSTVSETSVC<br>RVDRSHVFKHWVDTKDGHCGLPVSTTDGAILGLHSLSTMTNSQNFFAAFPESFEEDYLRSPESLEWVRKWSYNPDEVCVGSLQLQWSQPGEFPKPTKLMSDLN<br>AIPVYAQ                                                                                                                                                                                                          |
| Nlb                    | 7957                    | 9519                   | 521        | 59520,24 | 5,24       | AKHDTVWRDRNLGNLKAAGVCPQSLVTKHVYKKGKMLFELFLQTFPDEKSFKPLMGAYGKSKLNKEAYTKDLFKYATPISAGEVDETFEQAETLVIEMLEKGF<br>TECNVYTDDEIEALNMIKAAVAGALYSKKKEYFDLNAADDRDLDLHFSCKRLYMGKGLWNGSLKAEALRPMKINANKTRTFTAAPLDLLGGKVCVDDFNNMFY<br>NHHKCPWTVGITKFKYGDWTLNKLPEGLWYCDADGSDQFSSLSPLYLAVNLIRLAFMEDWEIGAQLKNLYTEIYTPILPDGTIVKVKGNNSGQSPSTVVDNT<br>LMVVLAMTYSCLKNIKPENHDQVCIFYANGDLLLLAIDPTYEWILDLSGLKFLREGLNDFSSRTNDKEELWFMMSHRGMKRDGPIPKLEPERIVSILEWDRASEPVH<br>RLEAICAAVWVWYDGLLQHIRKFAWILDQAPYSELARVGVKAPYIAETALKALYTCVPEPSAEDLSEYVRLNLMYDDAVESNDCEPVYHQ                                                                                                                              |
| CP                     | 9520                    | 10515                  | 332        | 37117,62 | 6,2        | SGTTEIKDAGTTPAKSVKTRTGTQOPLKPEGSTNPTDPPPTVEEIEEETPAQKALREARGKQATQPSYTYGRDTPRSPROVTTTSRVDRDVRNAGTVGTFI<br>VPRLQITSSKRLPIVDGRPVINLDHLA?YDPEQNTLANRSTQEQKAWYEGVNGDYGVSDDDEMSILLNGLMVMWCIENTSPNINGMVMMDGEEQVYPIKPLL<br>DHAVPTFRQIMTHFSIDAEAYIEKRNRIKAYMPRYGLQRNLTDMSLARYAFDYELHSNTPVRAREAHMQMKAALKNAQNRFLGLDGNVSTQEEDTERHTTDTV<br>RNIHNLGMRGVQ                                                                                                                                                                                                                                                                                                                             |

25 <sup>1</sup> Prediction of the SPV2 protein products based on the preliminary nucleotide annotated sequence deposited in GeneBank (Accession Number KU511269).

26 **Table S4. Expected gene products deriving from SPVC isolate AM-MB2<sup>1</sup>**

| Predicted Gene Product | Genome position (first) | Genome position (last) | Size (aas) | MW (Da)  | pI (calc.) | Sequence                                                                                                                                                                                                                                                                                                                                                                                                                                                                                                                                                                                                                                                                    |
|------------------------|-------------------------|------------------------|------------|----------|------------|-----------------------------------------------------------------------------------------------------------------------------------------------------------------------------------------------------------------------------------------------------------------------------------------------------------------------------------------------------------------------------------------------------------------------------------------------------------------------------------------------------------------------------------------------------------------------------------------------------------------------------------------------------------------------------|
| P1                     | 157                     | 2118                   | 654        | 73232,81 | 8,95       | MASATVSVKPAKGRKLTWKECCNKWGRAAMEQQQAHSRRRVELSRNQLAANIFAFVPETEWHKYFFGNRGGPSPQLEVLNSAIQYGEAFKYKDFDFTFCPCDCE FLEGHKCEECGTTFRKTDNLDNLMNVVARELGGYDAYASTWSEFEQAKLELEEVAPTAGQLRKQAQAAEKLDDKRSTRKEKEYVNSLWEAVEEAEATETGEA SDASEKAAELSGIPSSATAGEMFPPLVGHKNTVEITATSDVVVSECSNIQFGQITFEMPEENKDEKVVESLIEEVENATASAVMPIETGFFFTGIPAIPLPVVPPQGS MGVLQPAFMQVGTMPVNGIALADTHLETKETAVKEIEPAKEDIDVGAQKSTSLPAHLYPWAPRSKNSGATHHQMVRKWVVKTQEAEEMKQRAVWKKLDEQLAAR NEARKDLKVKWRWGLYRLVKTRKDNQRQRQKRMKEQQLLAMPPQLTGISIAGGPVAVSLQETPTVNGKISSTPSMKRKRILKSPKTSDDKIQLKATLKIACK QGLQVEIINKKTVKGVYRRHGGTNHLFLHLKHMEGWRKPVLDLHIHQEDIELVTMAARVGAWNKRFRSTSQLCKGTSGLVLPDKLTPGRGHAPKGLFVVRGALAEV VYDARMRLGRSTLPYIEQF |
| P1N-PISPO              | 157                     | 2087(+1)               | 644        | 71988,27 | 5,98       | MASATVSVKPAKGRKLTWKECCNKWGRAAMEQQQAHSRRRVELSRNQLAANIFAFVPETEWHKYFFGNRGGPSPQLEVLNSAIQYGEAFKYKDFDFTFCPCDCE FLEGHKCEECGTTFRKTDNLDNLMNVVARELGGYDAYASTWSEFEQAKLELEEVAPTAGQLRKQAQAAEKLDDKRSTRKEKEYVNSLWEAVEEAEATETGEA SDASEKAAELSGIPSSATAGEMFPPLVGHKNTVEITATSDVVVSECSNIQFGQITFEMPEENKDEKVVESLIEEVENATASAVMPIETGFFFTGIPAIPLPVVPPQGS MGVLQPAFMQVGTMPVNGIALADTHLETKETAVKEIEPAKEDIDVGAQKSTSLPAHLYPWAPRSKNSGATHHQMVRKWVVKTQEAEEMKQRAVWKKLDEQLAAR <b>ERSKERPQSEMEVGPLQAGQKDKGQPKAAAEETNGKGATTAPCNATSDFNHGFNSWWPSSSESAGDSYSEWKDFIDAFYAEAKDFKINSPIRQDTRVDKSNF KDCLQTRTSSGDYQQENRERSLQTRRNKPFVPSFKTHGRMEEACGSAYPPRRYRACNNGSSRRRCMEQIEPKPTMQRYQWVSSQSGQIDRSARSRAQAL RGSWGFSSRSIRADAAW</b>   |
| HCPPro                 | 2119                    | 3492                   | 458        | 52382,02 | 8,11       | SSTMERFLRGFDEKFKQLRQVSDHVCESYDQAEQAGAVAAIHLHMVCPMNRRTCKHCSNKIEDLSKDEWCDYVDFNTNKNRPLQLQLEFKDFKHLPLIMDFIAESL VQTNKDVRAFNEIQTLIGNRIDAPFTTVECNKLVKGGRAKGTFTKASEALLELARYLKNRTENIKKGLSQSFRNKISQKAAAMNLALMCDNQLDKNGLIWGERG YHSKRFFSNYFDEINPEEGYSRYIVRNNPNGTRKLAIGKLVSTNFSVFREQMKGEPHKKQLDNHCTSLDGNFIYPCCVCTYDDGQPMSEFKLPTKNHLVIGNSG DPKYVDMPEISKKMYIAKEYCYINIFLAMLVNVNEAEAKDFTKQVRDVLMEKLGKWPMTFVDATACAFMSVFYETRNAELPRILIDHTTKTMHVIDSFGSLSTGY HILKANTVSQLIKFANSSLDSEMKHYLVG                                                                                                                                                                                                        |
| P3                     | 3493                    | 4548                   | 352        | 39955,17 | 7,25       | GLTALPANEERCVRTVIKGVYRPKILYEILSEDPYMLMLSVISPCILALFNSGSLDRAMDTWITKQDEVAIVIGTSELARKVSTSRVLEQQLQIESQSHTLLFDDSTAR RRTPSFALSQRVIRLSERRETNRVLHEQGHTVSAYATSHELMEKIQWDTLLKQCEALALEKCSLIMRSSRYMRCIQGTLYRQSIDDFKGRVDASYITLHTKQVALS NTCKEGFVSRVAGAHARCVRITVQTSLSAIRFAVPDILKFNLLLVNLIQIAHVARNMVQKHQQAQIDLNAYLFDQIEDKINVIYDSFCKKIGGEPTMDEFLAHEIYIN PTLTGAKWLCYTADVEHQ                                                                                                                                                                                                                                                                                                                    |
| P3N-PIPO               | 3478                    | 4145(+1)               | 223        | 25598,61 | 9,58       | GLTALPANEERCVRTVIKGVYRPKILYEILSEDPYMLMLSVISPCILALFNSGSLDRAMDTWITKQDEVAIVIGTSELARKVSTSRVLEQQLQIESQSHTLLFDDSTAR RRTPSFALSQRVIRLSERRETNRVLHEQGHTVSAYATSHELMEK <b>NLGHSFKAGVRRRTCLVGKMLTNHAIQVYALYTRYVSATKYRRFRQRSSRILYICHTKECSI EQHL</b>                                                                                                                                                                                                                                                                                                                                                                                                                                       |
| 6K1                    | 4549                    | 4704                   | 52         | 5933,02  | 8,73       | GKSRKEVQYERIAFISLLMVIDSERSDCVYKILSKLRGLMGCIDGGVYHQ                                                                                                                                                                                                                                                                                                                                                                                                                                                                                                                                                                                                                          |
| CI                     | 4705                    | 6633                   | 643        | 72287,37 | 6,8        | SLDDITNILEEKNTLVDFELQGDQELSNAMTDATFDEWWRKQLETRNRTITHYRTEGTFIEFTRSNVSVANNIATLPANDILVRGAVGSGKSTGLPFYLSRKRGRVLLLE PTRPLAENVHRQLGGDPFMVQTLRMRGLTVFGSHPINIMTTGFAFHYYANNPEQLREYEFIFDECHVNDQAAMAFRCLLKEHEFSGKIIKASATPPGREVEFTTQ HPVQIKVEESLSFAKFAVEAQGTGSNADVVAVADNILLVYVASYNEVDLSRLLVEANHVKTVDGRTMKVGNVEIKTTGTSNKKHFIVATNIENGVTLDIEAVVDFGTK VTAYLDVDLRMIRTSKGPISYGERIQLGRVGRNKAGTALRIGYTEKGLVDIPQTVATEAAFLCFAYGLPVMTPNVSTLLGSCVTRQARMTMLQFELTPFYMVNMVR FDGSMHHAIHQLLKRYKLRDAETTLNKLAIIPNRGITWMSAADYRKYVQGRLDIEDQIRIPFYHQSMPEKLSHDIWEAIQRYKHEAGFRVSCINSCKIAYTLQTDVYAI PRTIKILDALIADEMRRKEHYKITIGRVSSSSFTLNSIATLWRNRYAQDYTSENIAVLSSARAQLLEFENLMSDASYNEMSGILETYVRESGATTCVLHQ         |
| 6K2                    | 6634                    | 6792                   | 53         | 5843,78  | 8,11       | TKSDLAKHLQLKGIWNKSVITQDILLVLAGVFGVGVWVVFSGAKESFEQVTVHQ                                                                                                                                                                                                                                                                                                                                                                                                                                                                                                                                                                                                                      |
| Nla                    | 6793                    | 8097                   | 435        | 48917,56 | 8,5        | GKEKRQRQKLFQRQARDRKLGEVHADDDGTEHIFGSAITAKGKQKGVKGMGVKNRKFINMYGDFDPTSEYFVRFVDPLTGLVFDSPYTDIQLVQEKIGDARHK AILEDKLSRERSYVNPVGSAYYINEITNAALKVDLTPHNPLLACERHSTIAGHPDHEGELRQTGAAVKVDIKDVPENPEEASLVGHESKSLFRGLDYNPIASVICHIL NEADGRTSDSYGIGYGLIITNRHLFKRNNGLTIRSRHGEFVKNNTTQLGMKPCADRDLIKMPKDIPFPQRLQFRIPKNERICLVGSNFQDKSITSTVSETSVALS VPNSHFWKHWIDTKDGHGCLPLVSTVDGAILGVHLSNLTNTQNFFAAVPANFVEDVYLKTEATEWIKKWSYNPSEICWGTLELTKGQPVAPFKVTKLITLDSMQV YAQ                                                                                                                                                                                                                                |
| VPg                    | 6793                    | 7368                   | 192        | 21627,34 | 7,26       | GKEKRQRQKLFQRQARDRKLGEVHADDDGTEHIFGSAITAKGKQKGVKGMGVKNRKFINMYGDFDPTSEYFVRFVDPLTGLVFDSPYTDIQLVQEKIGDARHK AILEDKLSRERSYVNPVGSAYYINEITNAALKVDLTPHNPLLACERHSTIAGHPDHEGELRQTGAAVKVDIKDVPENPEEASLVGHE                                                                                                                                                                                                                                                                                                                                                                                                                                                                             |
| Nlb                    | 8098                    | 9660                   | 521        | 59582,23 | 5,52       | ARSDRWVLDRLYGNLKAQGCPAQLVTKHVVKGCMLFDLYLQDQCDVRSFFKPLMGAYGKSRLNKEAYNKDLFKYATPINAGDVCHKTFEQAEALVDDMLKAN GFHKCNITDPEEIKALNMKAAVAMYSGKKKDYFDGMDDDKDIENLLFHSCKRLYMGQKGLWNGSLKAEALRPMKAVELNKRTRTFTAAPLDTLLGGKTCVDDFNN MFYNNHLKCPWTVGITKFKYQGWDRLLTSLPEDWIYCDADGSQFDSSLSPLYLNAVLRNREFMEEWDIGDQMLRNLYTEIVYTPILTPDGTIVKFKGNNSSGPSTVV DNTLMVVLAVFYTLKLGVESEFIEISRCVFFANGDDLLIAMRPTDTHLLDNFSECFAGLNLNYDFSSRTKKEELWFMSHCGIKRDIYPIKLEPERSIVILEWDRSHE PIHRLAICAAVMAWGYDELLHQIRKCYAWLQGPAYSELARTGKAPYIAETAKLSLYTGVPQSADDLSEYTRVLNEMYDSSLQDNELSVYHQ                                                                                                                                        |
| CP                     | 9661                    | 10599                  | 313        | 34986,39 | 6,83       | SGNPPPEFKDAGANPPAPKPGFAAPEITEVTEPEDPKQAALREARQKQAPVTPESYGRDTEKSMRSPQRVKDKDKNVAGTTGTFVVRVRLKHTGKMRQPRV NGISVNLQLHATYEPQHNIGNTRSTQEQFRAWYEGVKGDYGVDDAGMALLNGLMWWCIENGTSPNNGVWVMMDDGDEQVTVPIKPLLDHVAVPTFRQIMTHFS DVAAEAYIEMRNRTKAYMPRYGLQRNLTDMSLARYAFDFYELHSTTPARAKEAHMQMKAALKNHNRLFLGDGNVSTQEEDTERHTATDVTRNIHLLGMRGVH                                                                                                                                                                                                                                                                                                                                                        |

27 <sup>1</sup> Prediction of the SPVC protein products based on the preliminary nucleotide annotated sequence deposited in GeneBank (Accession Number KU511270).

28 **Table S5. Expected gene products deriving from unknown Sweet potato begomovirus isolate AM-MB2<sup>1</sup>**

| Predicted Gene Product | Genome position (first) | Genome position (last) | Size (aas) | MW (Da)  | pI (calc.) | Sequence                                                                                                                                                                                                                                                                                                                                                                            |
|------------------------|-------------------------|------------------------|------------|----------|------------|-------------------------------------------------------------------------------------------------------------------------------------------------------------------------------------------------------------------------------------------------------------------------------------------------------------------------------------------------------------------------------------|
| V2/MP                  | 43                      | 441                    | 132        | 15454,85 | 8,11       | MMTLLYKQDQSGCRAWRPSMAEMWDPLQNPLPDTLYGFRCLMSVKYLQGGILKKYEPGTLGFELCSELIRIFRVRQYDRANSRFAEISSLWGETGKTEAELRDSYRAL<br>HWECCPNCCPKLCPGFKRRPDEEKEG*                                                                                                                                                                                                                                         |
| V1/CP                  | 266                     | 1030                   | 254        | 29476,86 | 10,04      | MTGRIRVSPRFHPYGGRRVRRRLNFETAIVPYTGNAPVIAARSYVPSVSRGVRMKRRRGDRIPKGCVGPCKIQDYEFKMDVPHTGTFCVSDFTTRGTGLTHRLGKR<br>VCIKSMGIDGKVMDDNVAKRDHTNIITYWLIRDRRPNKDLNFGQIFTMYDNEPTTAKIRMDLRDRMQVLKKFSVTVSGGPYSHKEQALIRKFFKGLYNHVTYNHK<br>EEAKYENQLENALMLYSASSHASNPVYQTLRCRAYFYDSHNN*                                                                                                              |
| C3/REn                 | 1480                    | 1049                   | 144        | 16864,56 | 9,5        | MDSRTGESLSHAQTTRAVEFNTNPISVGRTPAPFHLRIMYVHESTQGRILKFLQVRVNHRRRRLGFGHKIFLQFRILTTTLTGAIHSWTGILERLKWHLICNELANLGLFS<br>LINLVFVIRYLPRVCSWIDEIDTDCNDDVKVLLY*                                                                                                                                                                                                                              |
| C2/TrAp                | 1643                    | 1200                   | 148        | 16560,58 | 8,08       | MSNPLSGYKRKCPIQEPLHTEAKKARKVPEQRTRIVWK?CGCSAFITTNCKYQHGFTHRGITKSCSDYESSRIQHQPHLCGSDCTIPS?NHVCPREHTGENHPQIP<br>TESQPQGKEAAGIPQDLPPIQDLDDPSNWCYSQLDWYFGTP*                                                                                                                                                                                                                            |
| C1/Rep                 | 2646                    | 1555                   | 364        | 40830,69 | 6,32       | MPRAGRFNIAKKNYFLTYPQCSTLKEEALDQLLHLNTPTNKFKIKICRELHENGEPHLHVLLQFEGNYQCTNQRFFDLVSPSRSSHFNPIQRAKSSSDVKSYVDKD<br>GDTIEWGEFQVDGRSARGGQQTANDAAAALNSGSKEAALQIIEKLEPKFIFQYHNLGCLDRIFSPPPSVYSSPFSSSSFNVAVDIISDWAENVMDSARPDRP<br>ISIVIEGSPRIGKTVWARSLGPHNYLCGHLDLSPKVYSNSAWYNVIDDVNPQYLKHFKEFMGAQKDWQSNCKYKGPVQIKGGIPTIFLCNPGEGSSFKLWLDKPEQG<br>ALKNWATANAIFCDVQSPFWVQEEVSHSGATAHRGEEGQEESS* |
| C4                     | 2495                    | 2235                   | 87         | 9533,85  | 9,6        | MKMGNLSTCCSSKGTNARIRDSSTLFPHQGHHTFTLISRELNPAPMSSPTSIRTVTQLNGVSSRSTADLLEASRLLMTQQQR*                                                                                                                                                                                                                                                                                                 |

29 <sup>1</sup>Prediction of the Sweet potato begomovirus protein products based on the preliminary nucleotide annotated sequence deposited in GeneBank (Accession Number KU511271).

30 **Table S6. Expected gene products deriving from unknown Sweet potato badnavirus isolate AM-MB2<sup>1</sup>**

| Predicted Gene Product | Genome position (first) | Genome position (last) | Size (aas) | MW (Da)  | pI (calc.) | Sequence                                                                                                                                                                                                                                                                                                                                                                                                                                                                                                                                                                                                                                                                                                                                                                                                                                                                                                                                                                                                                |
|------------------------|-------------------------|------------------------|------------|----------|------------|-------------------------------------------------------------------------------------------------------------------------------------------------------------------------------------------------------------------------------------------------------------------------------------------------------------------------------------------------------------------------------------------------------------------------------------------------------------------------------------------------------------------------------------------------------------------------------------------------------------------------------------------------------------------------------------------------------------------------------------------------------------------------------------------------------------------------------------------------------------------------------------------------------------------------------------------------------------------------------------------------------------------------|
| ORF1                   | (703)                   | (1131)                 | ND         | ND       | ND         | MSERWEKSLQNWYDSRRSHLEYLDLETVSKPSLSQLAHLNSIV[...]YVLEEKLEEQSLLIKRLEKGLEALTEEFSSRPLTA[...]                                                                                                                                                                                                                                                                                                                                                                                                                                                                                                                                                                                                                                                                                                                                                                                                                                                                                                                                |
| ORF2                   | ND                      | ND                     | ND         | ND       | ND         | [...]                                                                                                                                                                                                                                                                                                                                                                                                                                                                                                                                                                                                                                                                                                                                                                                                                                                                                                                                                                                                                   |
| ORF3a                  | (1486)                  | (4999)                 | ND         | ND       | ND         | [...]QGANLLITRGMVGRSLNTPNVGFNYNISAVTDYLASRGVRTLPGRRYSTADLQGLRWNIIRPREVIRPHPTMISRNLGGGFSLSFREYQPITTEQRRAAQHPE<br>EDSLEEEVGLVNLVEVLDWDGLDFPEPDPPTLVNFEIPEPEPQQQHPPEQVVEPVSDILEFRREYSSIWYDGSSEEEALLEFVYVSTTPDDSNYWSYSNAYRELAALAE<br>GNVSPNDVEGLEEEVEGGTSTHFSGGGEVPPSEPNCCIMCNKRGIPEDKILCQNCMDITDDSDDEREVERQERKRMQKQKEKRVTPSTSKQTSQEEIIGAIEGDP<br>WEEFEEMVERLHAQVTQQQPNPPADPQASNTRGQSAQSPYRPPEDTTMGQPSYAPARPTVETVSGPPSFRTDSRFLKRGNTNENWLSPPAQQQGGVLLTPEQ<br>MGLLNDVFMRWETTTLNHHMSLMNIQDTQEKVDYEMENLLGETAKLAWIQWRTVYEDEYKAIVAAQAEGRMGQTQNVISQVRRILTLSDPVQGSTAIQDQAYRDLERLQ<br>CHDVKDMVKFLNDYMRLATKTGRLYIGRELSDKLWIKMPGDLGTKIKEEFDKKHGPAEIAVIPRIFFAHKYLEDRCKEAAFRSLKSVSFCKDPIQGYGSDPKYTP<br>RKAKTYKGGKPHETHVRIDRRKNLDRNSHCKCFICEEPGHYARDCPNQKRNKRVMMFNQVNIPIPDYIVSVQENEDSDAIYSLTEGEEGDEIAFGVQESVHMISH<br>QVIGSWRAHIDMSEVQKVCRHQWQDHQEIEAPGEDTCLWCKHHINIRTRSHCPACLLTTCNICSLRYLGREVPPKAQERPLPFPDQTAIIQQQQLYMNWADQDRA<br>RLKQEVDEKRRGQLLFEAERRRTERLGEIEAQQLRIESMEEEQKLKNDLHAHTERDLQKKIKELKRLREEKIKRRSLRNGKDVRTGSSEDDASSEEASGSEN* |
| ORF3b                  | (5166)                  | (7481)                 | 771        | 85643,35 | 9,45       | MRVSIRIRGCPFEFVNAILDGTATVCCIEEERVPKEGLEESRMTAQFTGLNSTQQTRKKLKEGYMIIADHTFPLPFVYALNPMRIGRGIQFIICNFIRRMKGLRIEGP<br>TVTFYRNVSTIETQEKSTVAAAIGNINEERTMVFPFRKEVARLIQEGYIGENPLRHWSKNKVECTLRINKPDLVIQDPLKHVTPAAREFFQNVSSLIKAQLIRPSRS<br>RHRTTAFMVESGTSVDPKTGKEVRGKQRMVLYKRLNDNTEKDQYSLPGINTIISRVAGKKVFSKFDLKSFGHQIRMSKESIPWTFWTPDGLYEFVMPFGLVNA<br>PADFQRKMDNAFRGTEAFIAVYIDDLIFSETTEEDHEQHLLKFAQIVEKNGLLSPTKMKIGVKSVDLFGVKIHNKQVQLQEHLKIGDFREEDLLTKKGLRSWLGILNY<br>ARQHINLGMMLGPLYGKTSPTGEIRFNAQDWKLVREIKRKIQQLPPEIPPKDCCVLEADGCMGWDGWAICKWKQFAYDPRSKERITAYASGKFPKIPKSTIDAEIFAI<br>MNAMEAFKIYYLDKKEVMVRTDCQAVSFFNKSASNKPSRARWISFTDYITGTGKIRIEHIDGKDNTLADYLSRLVFSLLIAEWKQGRRSTAHHQASMAQTIGSCSK<br>QQEPLLLREPLKQEQEGTGEGPWGIEQLTLPLERLLKGLKTPYKNKLIIGTGLMNSLKIALRILDLSPEVIISTYKLEGYSEMGSQEMSVHNL*LIDSPYCMKRPRR<br>PGEAS*                                                                                                                                                                                                           |
| ORF4                   | (7055)                  | (7636)                 | 193        | 22065,72 | 6,99       | MENARQEINSPSPVNGPNHRVMQQAARAFALERATVEAGARRNRGRPMGHRVNPATRTPAQRFEWLSLQEQTYHRDWINEQFEDSLANLGPLARGYNFNI<br>QIERLFRDGLSGDVGTLVANRLSLLHEAAQEARRSVMTLQRMIRDRAEHNERFVTRDNAYMDLRQPYAEAQAQIEAAIILMACIEDL*                                                                                                                                                                                                                                                                                                                                                                                                                                                                                                                                                                                                                                                                                                                                                                                                                        |

31 <sup>1</sup>Prediction of the Sweet potato badnavirus protein products based on the preliminary nucleotide annotated sequence deposited in GeneBank (Accession Number KU511272). ND, not determined.  
32 [...] indicates gaps in the sequencing of the isolate AM-MB2. Provisional numbers (in brackets) are given to estimate positions, using the sequence of a Badnavirus B isolate (FJ560944.1) for the  
33 alignment

34 **Table S7. Detailed indel data of the sequence of Sweet potato potyviruses found in the AM-MB2 sample**

| Virus | Sample <sup>1</sup>       | Acc. #   | Position | Indel       | Length to stop codon/product | %      | Coverage |
|-------|---------------------------|----------|----------|-------------|------------------------------|--------|----------|
| SPFMV | AM-MB2 (sample 1)         | KU511268 | 1377     | A insertion | 231 aas/PISPO                | 13,21% | 2172     |
|       |                           |          | 3943     | A insertion | 66aas/PIPO                   | 1,02%  | 1541     |
|       |                           |          | 3943     | A deletion  | 6aas/?                       | 0,65%  | 3944     |
|       | AM-MB2 (sample 2)         | KU511268 | 1377     | A insertion | 231 aas/PISPO                | 10,47% | 1175     |
|       |                           |          | 3943     | A insertion | 66aas/PIPO                   | 1,38%  | 799      |
|       |                           |          | 3943     | A deletion  | 6aas/?                       | 0,50%  | 799      |
|       | AM-MB2 + SPCSV (sample 1) | KU511268 | 1377     | A insertion | 231 aas/PISPO                | 6,82%  | 13444    |
|       |                           |          | 3943     | A insertion | 66aas/PIPO                   | 1,02%  | 9837     |
|       |                           |          | 3943     | A deletion  | 6aas/?                       | 0,53%  | 9837     |
|       | AM-MB2 + SPCSV (sample 2) | KU511268 | 1377     | A insertion | 231 aas/PISPO                | 6,48%  | 12564    |
|       |                           |          | 3943     | A insertion | 66 aas/PIPO                  | 0,88%  | 11415    |
|       |                           |          | 3943     | A deletion  | 6 aas/?                      | 0,68%  | 11415    |
| SPV2  | AM-MB2 + SPCSV (sample 1) | KU511269 | 1231     | A insertion | 229 aas/PISPO                | 3,61%  | 7754     |
|       |                           |          | 3811     | A insertion | 64 aas/PIPO                  | 2,61%  | 3406     |
|       |                           |          | 3811     | A deletion  | 14 aas/?                     | 1,05%  | 3406     |
|       |                           |          | 5212     | T deletion  | 25 aas /?                    | 0,40%  | 1492     |
|       | AM-MB2 + SPCSV (sample 2) | KU511269 | 1231     | A insertion | 229 aas/PISPO                | 2,72%  | 8497     |
|       |                           |          | 3811     | A insertion | 64 aas/PIPO                  | 2,57%  | 3153     |
|       |                           |          | 3811     | A deletion  | 14 aas/?                     | 2,57%  | 3153     |
|       |                           |          | 5212     | T deletion  | 25 aas /?                    | 0,37%  | 930      |
| SPVC  | AM-MB2 + SPCSV (sample 1) | KU511270 | 3953     | A insertion | 67 aas/ PIPO                 | 2,58%  | 10183    |
|       | AM-MB2 + SPCSV (sample 2) | KU511270 | 3953     | A insertion | 67 aas/ PIPO                 | 2,38%  | 5751     |

35 <sup>1</sup>Two samples of the same plant material were processed in parallel as independent libraries, and the data was analysed separately.
